# Supplementary material for: An Mtr4/ZFC3H1 complex facilitates turnover of unstable nuclear RNAs to prevent their cytoplasmic transport and global translational repression
Source: PubMed Central journal article supplement — Genes Dev. 2017 Jun 15;31(12):1257–71. doi: 10.1101/gad.302604.117 (PMC5558927; doi:10.1101/gad.302604.117), 2017-06-15
Supplement: supp_gad.302604.117_Supplemental_Information.pdf [file supp_gad.302604.117_Supplemental_Information.pdf]

## SUPPLEMENTAL INFORMATION

### FIGURE LEGENDS

**Figure S1. Mtr4 controls pt- and ua-RNA expression via a NEXT and TRAMP-independent mechanism.**

(A) UCSC genome browser screenshot of a representative example of RNA-Seq data at *CSTF3* locus. (B) Western blot analysis of HeLa cell extracts after 48 hours KD of Mtr4 using a second Mtr4 siRNA, s223606. (C) RT-qPCR analysis of ptRNA and uaRNA after Mtr4 KD using s223606. proRBM39 was included as a positive control of RNA accumulation after Mtr4 depletion. Transcript levels were normalized to GAPDH mRNA, and normalized levels in siCtrl-treated cells were set to 1. Bars represent mean  $\pm$  SD (n=3), and asterisks denotes significant difference from siCtrl (P<0.05) using an unpaired Student's t-test. (D) Western blot analysis of HeLa cell extracts after 96 hours KD of ZCCHC7. (E) RT-qPCR analysis of ptRNA, full-length mRNA (FL mRNA) and uaRNAs. RNA levels were normalized to GAPDH mRNA, and the normalized levels in siCtrl-treated cells were set to 1. Bars represent mean  $\pm$  SD (n=3), and asterisks denote significant difference from siCtrl (P<0.05) using an unpaired Student's t-test. (F) Western blot analysis of HeLa cell extracts after 96 hours KD of the nuclear exosome catalytic subunits Dis3 and Rrp6. (G) RT-qPCR analysis of ptRNA and uaRNA after depletion of Dis3/Rrp6. Transcript levels were normalized to GAPDH mRNA, and the normalized levels in siCtrl-treated cells were set to 1. Bars represent mean  $\pm$  SD (n=3), and asterisks denote significant difference from siCtrl (P<0.05) using an unpaired Student's t-test.

**Figure S2. Co-IP analysis of Mtr4 complexes.**

(A, B) HeLa cells were transfected with the indicated plasmids for 30 hours, and cell extracts were used for IP with anti-Flag in the presence of Benzonase and RNase A followed by western blotting with antibodies against the proteins indicated on the right. Note that the interaction of TRAMP with U5-40K and hnRNP M was observed only when nuclear extracts prepared using high salt buffer were used. (C) Cell extracts prepared from HEK293 cells were used for co-IP with anti-ZCCHC8 antibodies in the presence of Benzonase and RNase A followed by western blotting with antibodies against the proteins indicated on the right.

**Figure S3. Effects of PABPN1 knockdown on pt- and ua-RNA abundances.**

(A) Cell extracts prepared from HEK293 and HEK293 cells stably expressing 3FLAG-Mtr4 were used for IP with anti-Flag antibodies in the presence of Benzonase and RNase A followed by western blotting with the indicated antibodies. (B) Cell extracts prepared from HEK293 cells were used for co-IP experiment with anti-ZFC3H1 in the presence of Benzonase and RNase A followed by western blotting with antibodies against the proteins indicated on the right. (C) Western blot analysis of HeLa cell extracts after 72 hours KD treatment with the siRNAs indicated at the top, with antibodies against the proteins indicated on the right. (D, E) RT-qPCR analysis of indicated ptRNAs (D) and indicated uaRNAs and NEXT substrates proRBM39 and proBIRC4 (E) after the indicated siRNA transfections. Transcript levels were normalized to GAPDH mRNA, and the normalized levels in siCtrl-treated cells were set to 1. Bars represent mean  $\pm$  SD (n=3), and asterisks denote significant difference from siCtrl ( $P < 0.05$ ) using an unpaired Student's t-test.

**Figure S4. Poly(A) tail length analysis of pt- and ua-RNAs by RNA ligation coupled poly(A) test (RL-PAT) assay.**

(A) Schematic illustration of the RL-PAT assay. RNAs were ligated with the anchor oligonucleotide and reverse-transcribed using the primer complementary to the anchor sequence. The resulting cDNA was subjected to semi-nested PCR, and PCR products were resolved in 2.0% agarose gels prestained with EtBr. (B) RL-PAT assay analysis of pt- and ua-RNAs following either control siRNA (siCtrl) or Mtr4 siRNA (siMtr4) treatment of HeLa cells for 72 hours. RNAs digested with RNase H in the presence of oligo(dT) were analyzed to mark positions of deadenylated RNAs (lanes 3 and 4).

**Figure S5. Quantitation of polysome fractionation after Mtr4 knockdown.**

Band strength in each fraction in Figure 6B-6D was quantitated using Image-studio software LICOR. Absolute signal values after background subtraction are plotted. Ribosome-bound and -free fractions are indicated by a red dashed line.

**Figure S6. Polysome fractionation after Mtr4 knockdown.**

(A) Agarose gel electrophoresis-EtBr staining analysis of extracted RNAs from sucrose gradient fractions, corresponding to Figure 6A. (B) UV absorption profiles at 254 nm (upper) and agarose gel electrophoresis-EtBr staining analysis (below) of sucrose gradients. HeLa cells were transfected with either control (Ctrl) or Mtr4 siRNA for 72 hours, and cytoplasmic extracts were separated using 15-45% sucrose gradients. (C) UV absorption profiles at 254 nm of sucrose gradients of samples from Mtr4 KD using a second siRNA, s223606. HeLa cells were transfected with either siCtrl or siMtr4 s223606 for 72 hours, and cytoplasmic

extracts were resolved using 15-45% sucrose gradients. **(D)** RT-qPCR analysis of ptRNA and uaRNA after the indicated hours of Mtr4 KD. Transcript levels were normalized to GAPDH mRNA, and the normalized levels in siCtrl-treated cells were set to 1.

**Figure S7. Northern blotting analysis of pre-rRNA processing.**

**(A)** Schematic of the human pre-rRNA showing the positions of the oligonucleotide probes.

**(B)** Northern blot analysis of HeLa RNA extracts after 72 hours treatment of the indicated siRNAs. Unprocessed and mature rRNAs were detected using the indicated probes. Arrows and asterisks indicate accumulated precursors and mature rRNAs, respectively.

## **MATERIALS AND METHODS**

### **Northern blotting**

Northern blotting conditions were adapted from Wang and Pestov (2016). In brief, total RNA was extracted with TRIzol (Invitrogen) from untransfected HeLa cells or 72h after transfection with siRNAs. One (for 18S), 2 (for ITS1) or 8 (for 5.8S and ITS2)  $\mu\text{g}$  of total RNAs were separated on a 1% (for 18S and ITS1) or 1.8% (for 5.8S and ITS2) formaldehyde agarose gel using a Tricine-triethanolamine buffer. After O/N passive transfer to Hybond N+ membranes, blots were hybridized with  $^{32}\text{P}$ -labeled oligo probes in hybridization solution ( $5\times\text{SSC}$ ,  $5\times\text{Denhardt's solution}$ , 0.5% SDS). After O/N incubation at  $37^\circ\text{C}$ , blots were washed in  $2\times\text{SSC}/0.1\% \text{SDS}$  at RT for 10 min, in  $2\times\text{SSC}/0.1\% \text{SDS}$  at  $42^\circ\text{C}$  for 10 min, in  $1\times\text{SSC}/0.1\% \text{SDS}$  at  $42^\circ\text{C}$  for 10 min followed by  $1\times\text{SSC}/0.1\% \text{SDS}$  at  $42^\circ\text{C}$  for 20 min and autoradiography.

### **RNA-ligation coupled PAT assay (RL-PAT)**

DNase I-treated total RNAs were ligated with KO109 5'-Phospho-CGC GGC CGC GGA GCT CGC- NH<sub>2</sub>-3' oligonucleotide using T4 RNA ligase 1 (New England Biolabs) in the presence of 15% PEG8000 at 14°C for 30 min, and reverse-transcribed with KO108 5'-GCG AGC TCC GCG GCC GCG-3' using Maxima Reverse Transcriptase (Thermo Fischer Scientific). Semi-nested PCR was performed using gene-specific forward primers (Table S2) and KO105 5'-GCG AGC TCC GCG GCC GCG TTT TT-3' reverse primer. PCR products were resolved in 2.0% agarose gel prestained with EtBr. To remove poly(A) tails, 10 µg of DNase I-treated RNAs were mixed with 50 pmol of oligo(dT)<sub>18</sub> in RNase H buffer (50 mM Tris-HCl (pH 7.4), 100 mM NaCl, 10 mM MgCl<sub>2</sub>) and incubated at 85°C for 5 min, 42 °C for 10 min, and then incubated in the presence of 2U Hybridase-Thermostable RNase H (Epicentre) at 42°C for 30 min. RNase H-treated RNAs were isolated using TRIzol.

## **SUPPLEMENTAL REFERENCE**

Wang M, Pestov DG 2016. Quantitative northern blot analysis of mammalian rRNA processing. *Methods Mol Biol* **1455**:147-157.

**A**

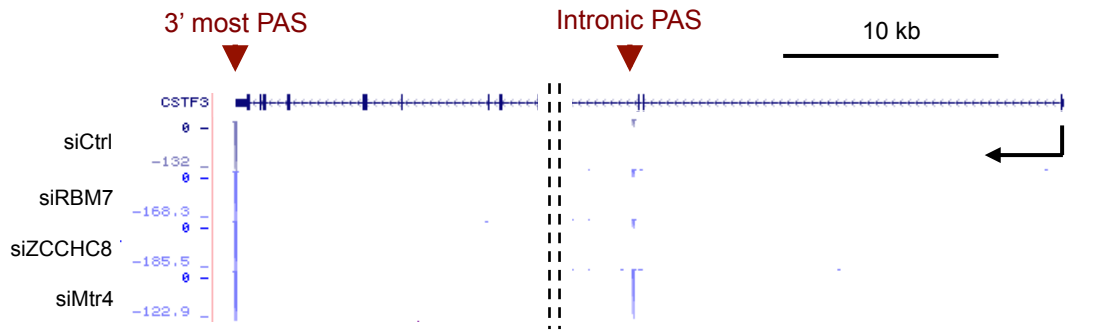

**B**

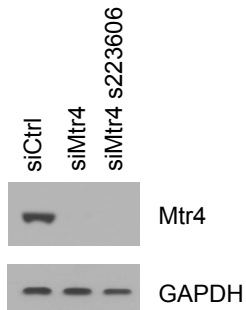

**C**

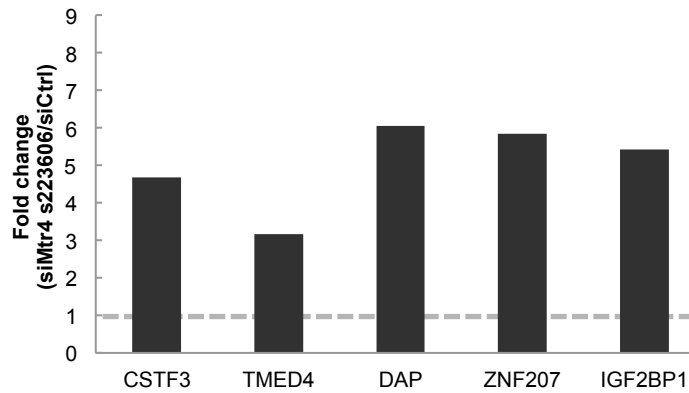

**D**

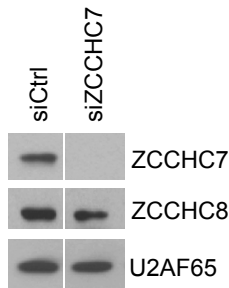

**E**

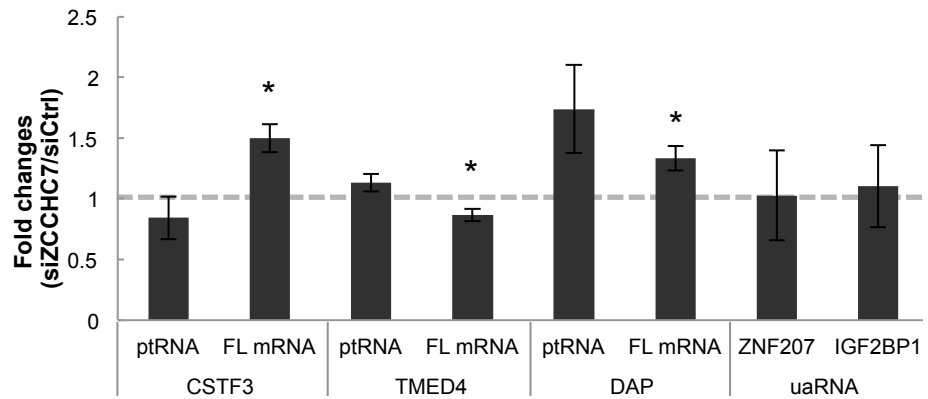

**F**

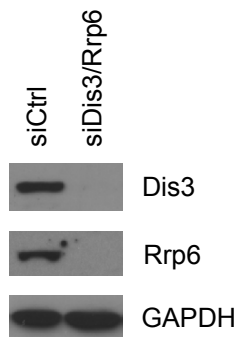

**G**

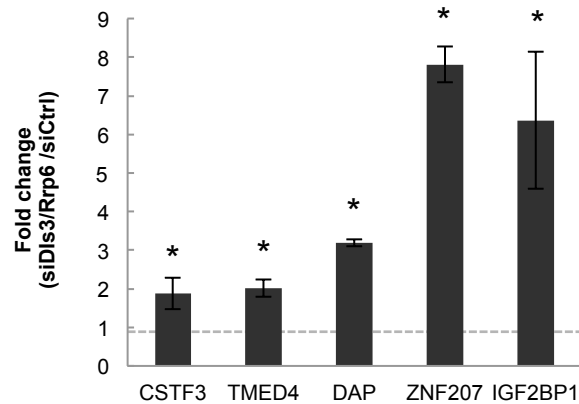

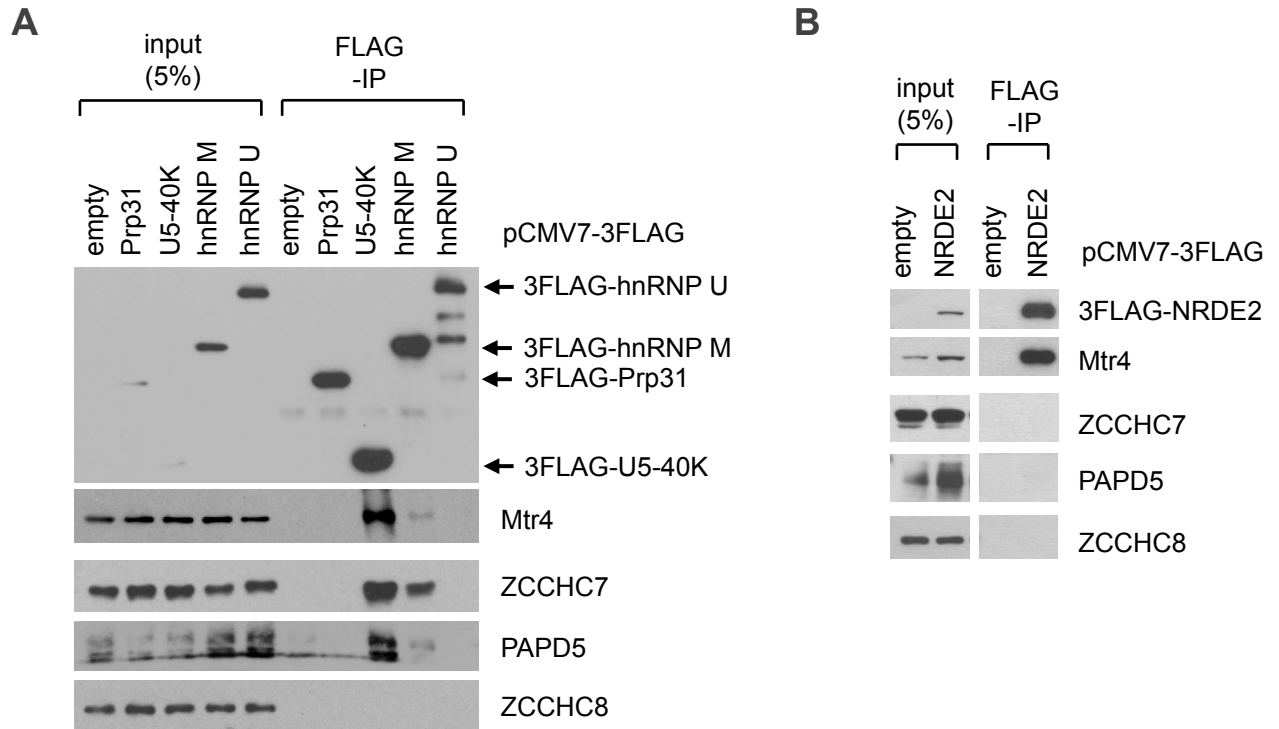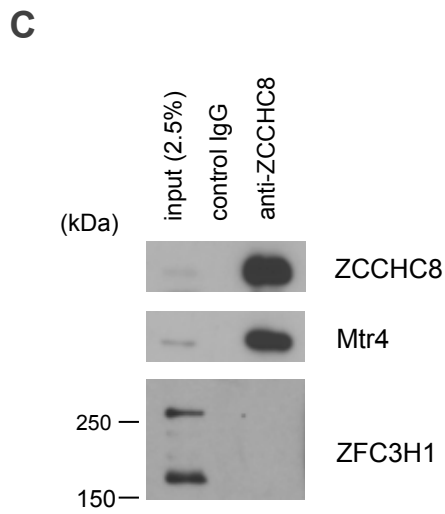

**A**

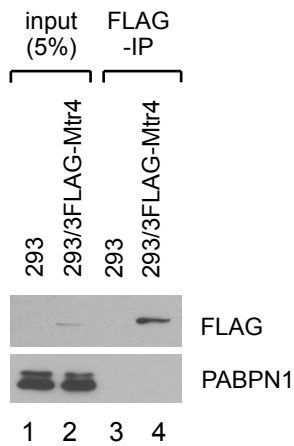

**B**

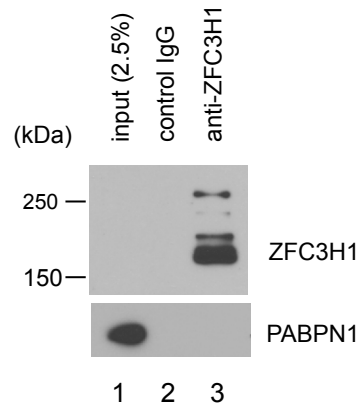

**C**

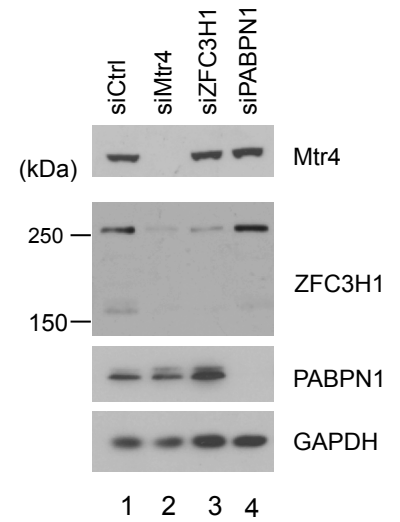

**D**

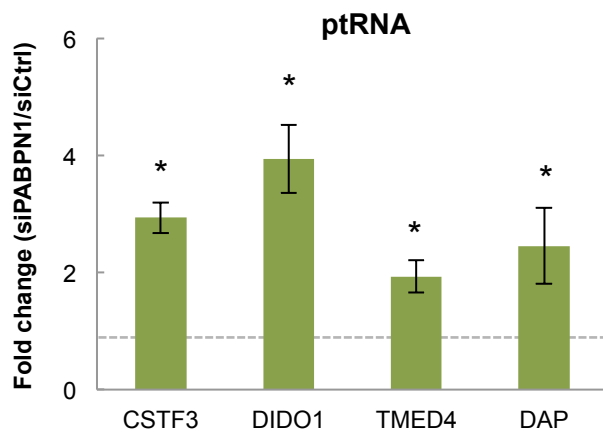

**E**

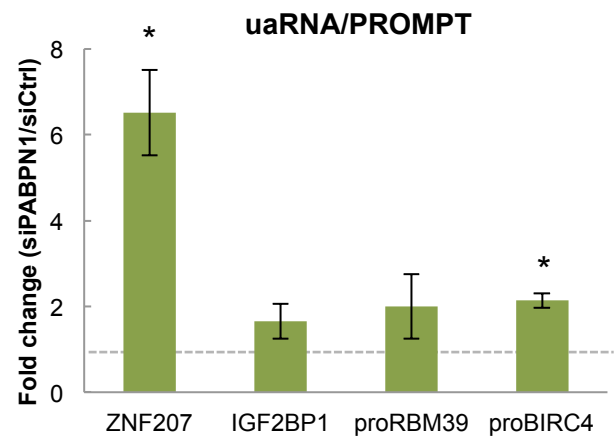



**A**

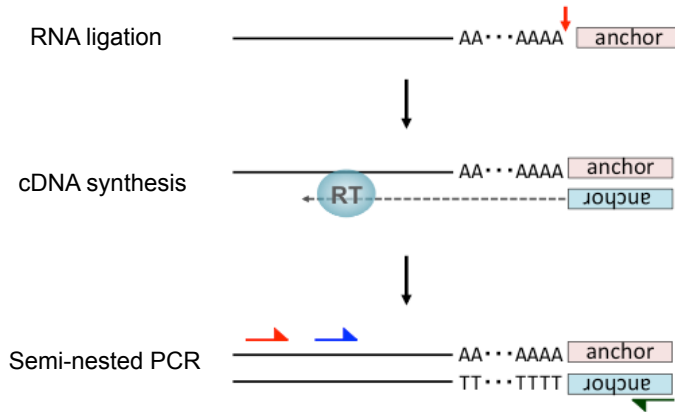

**B**

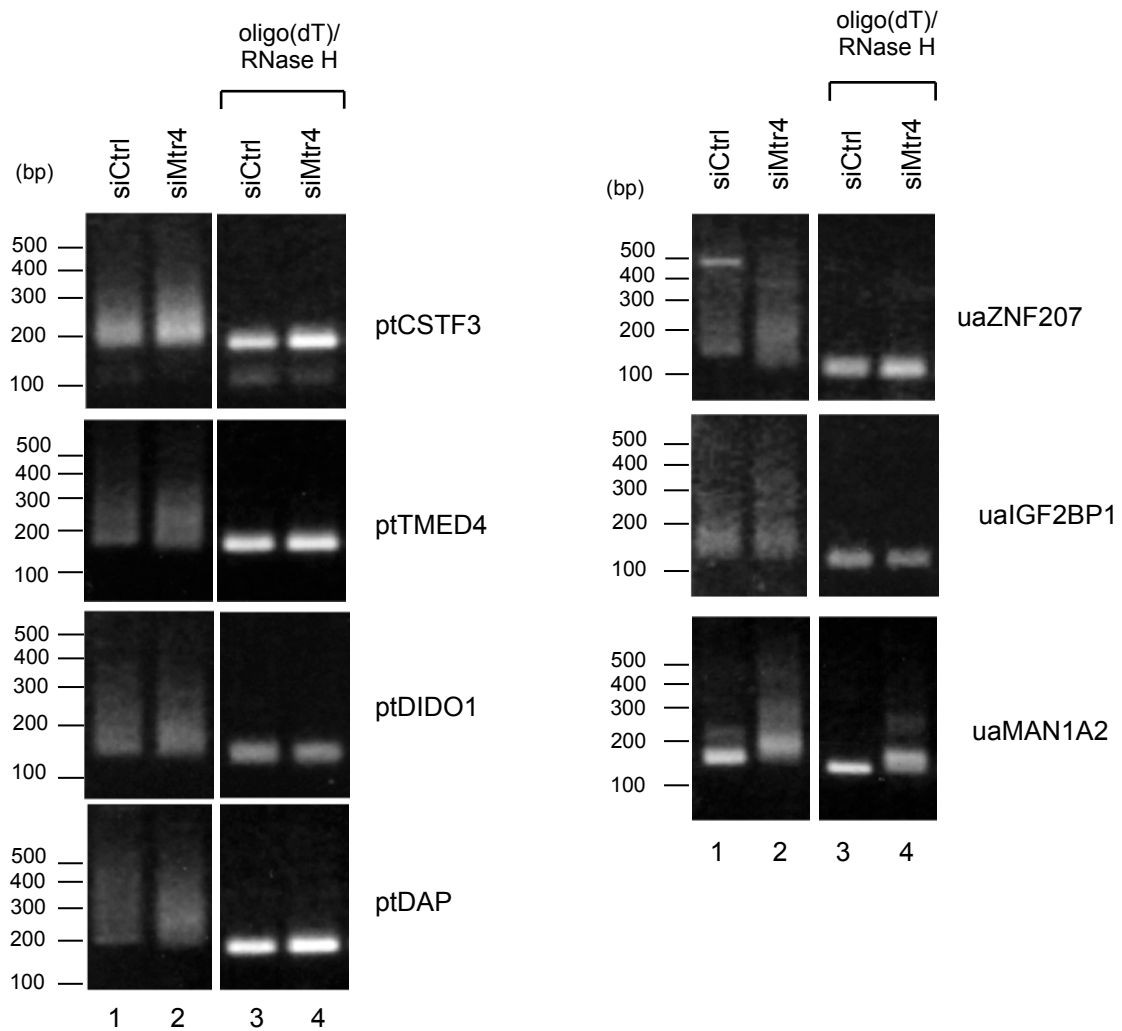



**A**

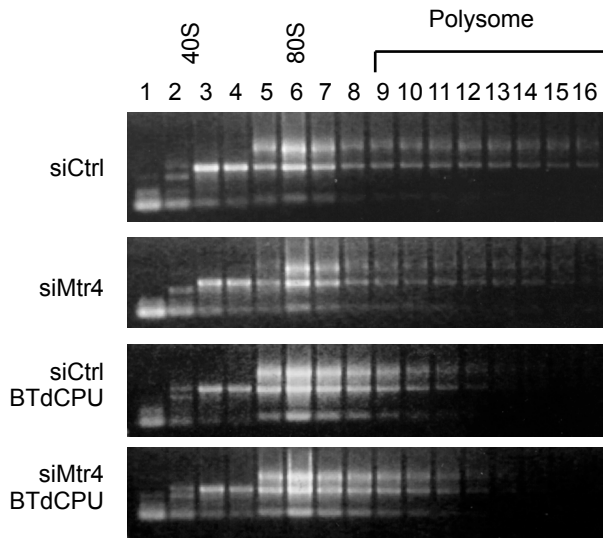

**B**

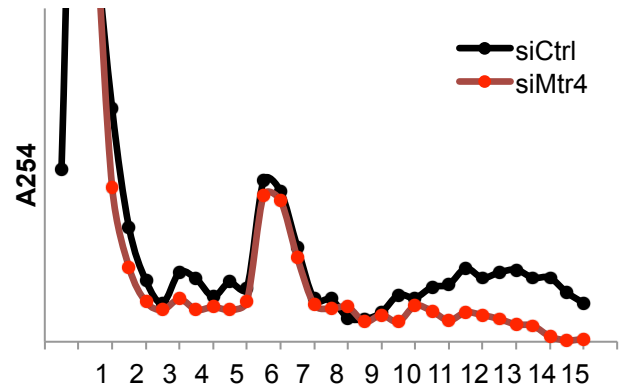

**C**

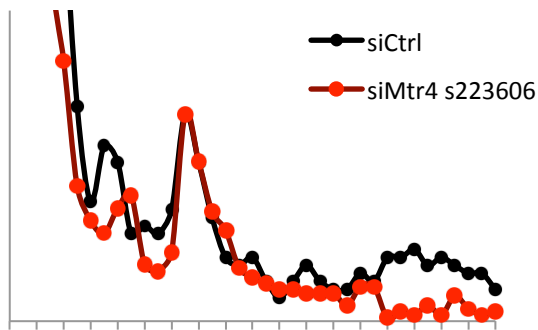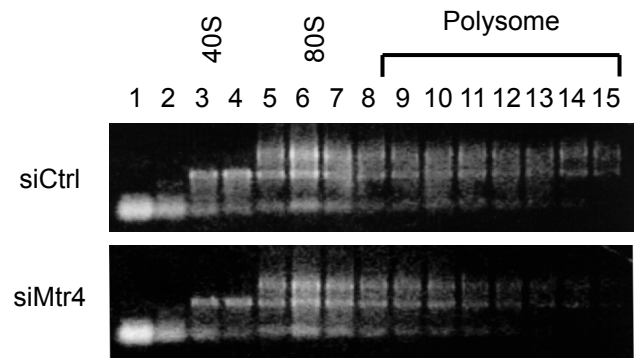

**D**

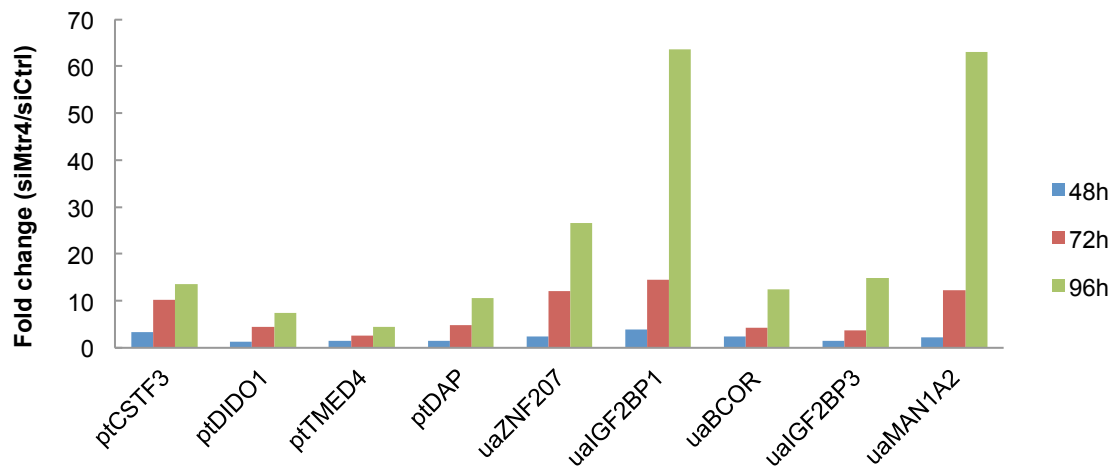

**A**

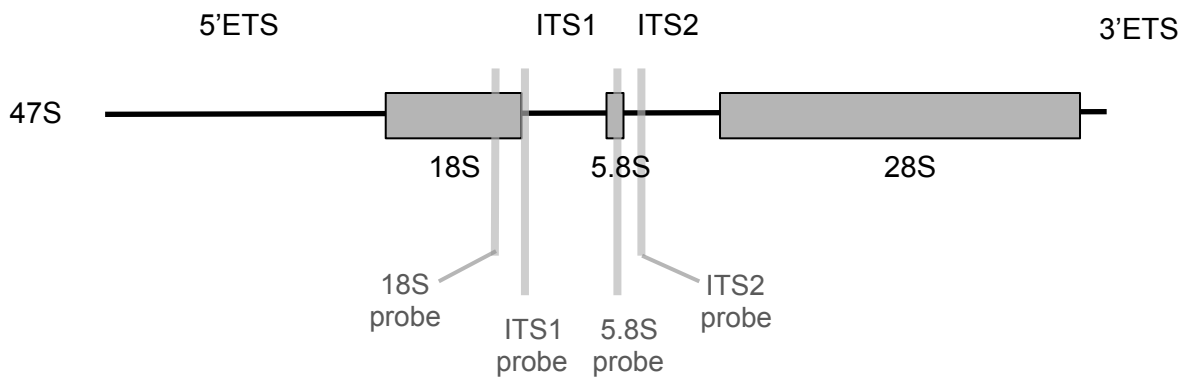

**B**

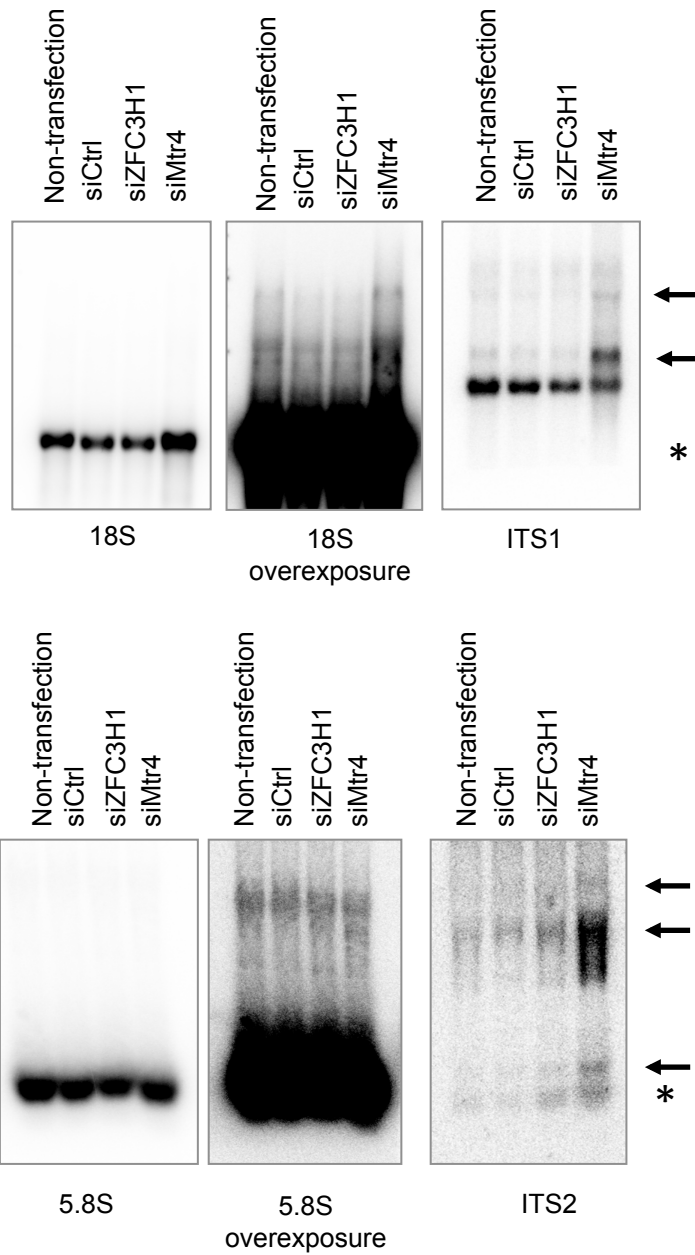

**Table S1. Proteins identified in gel filtration-coupled co-IP and MS analysis**

| Accession | Description | A     |            | B     |            | C     |            |
|-----------|-------------|-------|------------|-------|------------|-------|------------|
|           |             | 293   | Mtr4       | 293   | Mtr4       | 293   | Mtr4       |
| P42285    | SKIV2L2     | 0(0%) | 161(29.9%) | 0(0%) | 282(59.1%) | 0(0%) | 117(38.5%) |
| Q6NZY4    | ZCCHC8      | 0(0%) | 23(19.8%)  | 0(0%) | 120(51.8%) | 0(0%) | 0(0%)      |
| O60293    | ZFC3H1      | 0(0%) | 10(4.1%)   | 0(0%) | 60(18.2%)  | 0(0%) | 0(0%)      |
| P21333    | FLNA        | 0(0%) | 4(1.6%)    | 0(0%) | 60(17.7%)  | 0(0%) | 0(0%)      |
| Q14152    | EIF3A       | 0(0%) | 0(0%)      | 0(0%) | 45(17.6%)  | 0(0%) | 0(0%)      |
| Q9P2R3    | ANKFY1      | 0(0%) | 0(0%)      | 0(0%) | 44(16.6%)  | 0(0%) | 0(0%)      |
| Q9Y580    | RBM7        | 0(0%) | 8(16.2%)   | 0(0%) | 34(51.8%)  | 0(0%) | 0(0%)      |
| P78371    | CCT2        | 0(0%) | 0(0%)      | 0(0%) | 42(40.2%)  | 0(0%) | 0(0%)      |
| P55884    | EIF3B       | 0(0%) | 0(0%)      | 0(0%) | 41(29.6%)  | 0(0%) | 0(0%)      |
| Q9H7Z3    | NRDE2       | 0(0%) | 0(0%)      | 0(0%) | 16(17.2%)  | 0(0%) | 12(5.3%)   |
| Q01780    | EXOSC10     | 0(0%) | 6(8.1%)    | 0(0%) | 22(18.3%)  | 0(0%) | 0(0%)      |
| P55072    | VCP         | 0(0%) | 0(0%)      | 0(0%) | 26(24.8%)  | 0(0%) | 0(0%)      |
| P49368    | CCT3        | 0(0%) | 0(0%)      | 0(0%) | 24(29.2%)  | 0(0%) | 2(3.3%)    |
| P68363    | TUBA1B      | 0(0%) | 4(11.8%)   | 0(0%) | 22(19.3%)  | 0(0%) | 0(0%)      |
| Q71U36    | TUBA1A      | 0(0%) | 4(11.8%)   | 0(0%) | 21(16.2%)  | 0(0%) | 0(0%)      |
| Q9BQE3    | TUBA1C      | 0(0%) | 4(11.8%)   | 0(0%) | 21(14%)    | 0(0%) | 0(0%)      |
| P17987    | TCP1        | 0(0%) | 0(0%)      | 0(0%) | 24(18.9%)  | 0(0%) | 0(0%)      |
| Q6PEY2    | TUBA3E      | 0(0%) | 2(8.4%)    | 0(0%) | 21(16.2%)  | 0(0%) | 0(0%)      |
| Q13748    | TUBA3C      | 0(0%) | 2(8.4%)    | 0(0%) | 21(16.2%)  | 0(0%) | 0(0%)      |
| Q13347    | EIF3I       | 0(0%) | 0(0%)      | 0(0%) | 23(46.8%)  | 0(0%) | 0(0%)      |
| P50991    | CCT4        | 0(0%) | 0(0%)      | 0(0%) | 22(26.3%)  | 0(0%) | 0(0%)      |
| P68366    | TUBA4A      | 0(0%) | 0(0%)      | 0(0%) | 22(19.4%)  | 0(0%) | 0(0%)      |
| Q99832    | CCT7        | 0(0%) | 0(0%)      | 0(0%) | 21(27.4%)  | 0(0%) | 0(0%)      |
| B5ME19    | EIF3CL      | 0(0%) | 0(0%)      | 0(0%) | 20(17.3%)  | 0(0%) | 0(0%)      |
| Q99613    | EIF3C       | 0(0%) | 0(0%)      | 0(0%) | 20(17.3%)  | 0(0%) | 0(0%)      |
| Q00839    | HNRNPU      | 0(0%) | 8(8.5%)    | 0(0%) | 11(12.4%)  | 0(0%) | 0(0%)      |
| Q07020    | RPL18       | 0(0%) | 16(26.6%)  | 0(0%) | 3(11.7%)   | 0(0%) | 0(0%)      |
| Q02878    | RPL6        | 0(0%) | 12(14.2%)  | 0(0%) | 7(16.7%)   | 0(0%) | 0(0%)      |
| P62913    | RPL11       | 0(0%) | 14(17.4%)  | 0(0%) | 5(16.9%)   | 0(0%) | 0(0%)      |
| Q13200    | PSMD2       | 0(0%) | 0(0%)      | 0(0%) | 19(16.5%)  | 0(0%) | 0(0%)      |
| P05387    | RPLP2       | 0(0%) | 14(691.6%) | 0(0%) | 3(46.1%)   | 0(0%) | 0(0%)      |

|        |          |       |           |       |           |       |          |
|--------|----------|-------|-----------|-------|-----------|-------|----------|
| P62266 | RPS23    | 0(0%) | 14(23.1%) | 0(0%) | 3(13.3%)  | 0(0%) | 0(0%)    |
| P62241 | RPS8     | 0(0%) | 11(31.7%) | 0(0%) | 6(13%)    | 0(0%) | 0(0%)    |
| Q5RKV6 | EXOSC6   | 0(0%) | 4(18%)    | 0(0%) | 7(12.9%)  | 0(0%) | 6(10.3%) |
| Q5VTE0 | EEF1A1P5 | 0(0%) | 4(5%)     | 0(0%) | 13(16.5%) | 0(0%) | 0(0%)    |
| P68104 | EEF1A1   | 0(0%) | 4(5%)     | 0(0%) | 13(16.5%) | 0(0%) | 0(0%)    |
| Q9BXP5 | SRRT     | 0(0%) | 0(0%)     | 0(0%) | 16(8.2%)  | 0(0%) | 0(0%)    |
| P62424 | RPL7A    | 0(0%) | 12(23.7%) | 0(0%) | 4(7.1%)   | 0(0%) | 0(0%)    |
| Q13162 | PRDX4    | 0(0%) | 0(0%)     | 0(0%) | 11(38.4%) | 0(0%) | 5(7.7%)  |
| P60228 | EIF3E    | 0(0%) | 0(0%)     | 0(0%) | 15(21.1%) | 0(0%) | 0(0%)    |
| P11940 | PABPC1   | 0(0%) | 0(0%)     | 0(0%) | 15(14.8%) | 0(0%) | 0(0%)    |
| Q13310 | PABPC4   | 0(0%) | 0(0%)     | 0(0%) | 15(14.1%) | 0(0%) | 0(0%)    |
| O75821 | EIF3G    | 0(0%) | 0(0%)     | 0(0%) | 15(37.2%) | 0(0%) | 0(0%)    |
| O00231 | PSMD11   | 0(0%) | 0(0%)     | 0(0%) | 14(19.4%) | 0(0%) | 0(0%)    |
| Q13868 | EXOSC2   | 0(0%) | 7(14.3%)  | 0(0%) | 7(27%)    | 0(0%) | 0(0%)    |
| P40227 | CCT6A    | 0(0%) | 0(0%)     | 0(0%) | 14(18.5%) | 0(0%) | 0(0%)    |
| P06576 | ATP5B    | 0(0%) | 0(0%)     | 0(0%) | 14(14.2%) | 0(0%) | 0(0%)    |
| P26641 | EEF1G    | 0(0%) | 0(0%)     | 0(0%) | 14(16.9%) | 0(0%) | 0(0%)    |
| P78527 | PRKDC    | 0(0%) | 0(0%)     | 0(0%) | 13(3.5%)  | 0(0%) | 0(0%)    |
| O43242 | PSMD3    | 0(0%) | 0(0%)     | 0(0%) | 12(18.9%) | 0(0%) | 0(0%)    |
| P39023 | RPL3     | 0(0%) | 0(0%)     | 0(0%) | 12(22.8%) | 0(0%) | 0(0%)    |
| P61353 | RPL27    | 0(0%) | 7(20.6%)  | 0(0%) | 5(23.5%)  | 0(0%) | 0(0%)    |
| P46781 | RPS9     | 0(0%) | 5(16%)    | 0(0%) | 7(13.9%)  | 0(0%) | 0(0%)    |
| O15371 | EIF3D    | 0(0%) | 0(0%)     | 0(0%) | 12(18.1%) | 0(0%) | 0(0%)    |
| O75643 | SNRNP200 | 0(0%) | 0(0%)     | 0(0%) | 12(5.9%)  | 0(0%) | 0(0%)    |
| P36578 | RPL4     | 0(0%) | 7(6.6%)   | 0(0%) | 5(13.1%)  | 0(0%) | 0(0%)    |
| Q9Y262 | EIF3L    | 0(0%) | 0(0%)     | 0(0%) | 12(8.7%)  | 0(0%) | 0(0%)    |
| Q9Y3B2 | EXOSC1   | 0(0%) | 2(15.9%)  | 0(0%) | 9(11.8%)  | 0(0%) | 0(0%)    |
| Q9NQT4 | EXOSC5   | 0(0%) | 0(0%)     | 0(0%) | 11(28.9%) | 0(0%) | 0(0%)    |
| Q09161 | NCBP1    | 0(0%) | 2(2.9%)   | 0(0%) | 9(10.9%)  | 0(0%) | 0(0%)    |
| P05388 | RPLP0    | 0(0%) | 11(30.6%) | 0(0%) | 0(0%)     | 0(0%) | 0(0%)    |
| P62249 | RPS16    | 0(0%) | 0(0%)     | 0(0%) | 11(37.7%) | 0(0%) | 0(0%)    |
| P62753 | RPS6     | 0(0%) | 7(20.1%)  | 0(0%) | 4(16.9%)  | 0(0%) | 0(0%)    |
| P33176 | KIF5B    | 0(0%) | 0(0%)     | 0(0%) | 10(10%)   | 0(0%) | 0(0%)    |
| P50914 | RPL14    | 0(0%) | 6(8.8%)   | 0(0%) | 4(5.6%)   | 0(0%) | 0(0%)    |

|        |           |       |          |       |           |       |          |
|--------|-----------|-------|----------|-------|-----------|-------|----------|
| P38646 | HSPA9     | 0(0%) | 0(0%)    | 0(0%) | 10(10.6%) | 0(0%) | 0(0%)    |
| Q13263 | TRIM28    | 0(0%) | 0(0%)    | 0(0%) | 10(17.4%) | 0(0%) | 0(0%)    |
| Q15024 | EXOSC7    | 0(0%) | 5(20.6%) | 0(0%) | 5(18.6%)  | 0(0%) | 0(0%)    |
| P52272 | HNRNPM    | 0(0%) | 4(4%)    | 0(0%) | 5(5.2%)   | 0(0%) | 0(0%)    |
| P60866 | RPS20     | 0(0%) | 2(19.3%) | 0(0%) | 7(22.7%)  | 0(0%) | 0(0%)    |
| P10809 | HSPD1     | 0(0%) | 0(0%)    | 0(0%) | 9(14%)    | 0(0%) | 0(0%)    |
| Q99547 | MPHOSPH6  | 0(0%) | 0(0%)    | 0(0%) | 6(30.6%)  | 0(0%) | 3(13.8%) |
| Q8NHW5 | RPLP0P6   | 0(0%) | 9(18.3%) | 0(0%) | 0(0%)     | 0(0%) | 0(0%)    |
| P31943 | HNRNPH1   | 0(0%) | 4(6%)    | 0(0%) | 5(15.6%)  | 0(0%) | 0(0%)    |
| Q9NQT5 | EXOSC3    | 0(0%) | 0(0%)    | 0(0%) | 6(28.7%)  | 0(0%) | 2(7.3%)  |
| P07910 | HNRNPC    | 0(0%) | 8(19.9%) | 0(0%) | 0(0%)     | 0(0%) | 0(0%)    |
| P11021 | HSPA5     | 0(0%) | 0(0%)    | 0(0%) | 8(14.1%)  | 0(0%) | 0(0%)    |
| P23246 | SFPQ      | 0(0%) | 0(0%)    | 0(0%) | 8(7.8%)   | 0(0%) | 0(0%)    |
| P15880 | RPS2      | 0(0%) | 3(7.5%)  | 0(0%) | 5(12.6%)  | 0(0%) | 0(0%)    |
| P29692 | EEF1D     | 0(0%) | 0(0%)    | 0(0%) | 8(23.5%)  | 0(0%) | 0(0%)    |
| O15397 | IPO8      | 0(0%) | 0(0%)    | 0(0%) | 8(9.8%)   | 0(0%) | 0(0%)    |
| Q99460 | PSMD1     | 0(0%) | 0(0%)    | 0(0%) | 8(11.9%)  | 0(0%) | 0(0%)    |
| Q92769 | HDAC2     | 0(0%) | 0(0%)    | 0(0%) | 8(11.9%)  | 0(0%) | 0(0%)    |
| P51665 | PSMD7     | 0(0%) | 0(0%)    | 0(0%) | 8(14.2%)  | 0(0%) | 0(0%)    |
| Q9Y4E8 | USP15     | 0(0%) | 0(0%)    | 0(0%) | 0(0%)     | 0(0%) | 7(6.8%)  |
| Q9NPD3 | EXOSC4    | 0(0%) | 0(0%)    | 0(0%) | 7(13.9%)  | 0(0%) | 0(0%)    |
| Q9H361 | PABPC3    | 0(0%) | 0(0%)    | 0(0%) | 7(2.2%)   | 0(0%) | 0(0%)    |
| P62195 | PSMC5     | 0(0%) | 0(0%)    | 0(0%) | 7(21.2%)  | 0(0%) | 0(0%)    |
| P62280 | RPS11     | 0(0%) | 5(21.5%) | 0(0%) | 2(18.4%)  | 0(0%) | 0(0%)    |
| Q16576 | RBBP7     | 0(0%) | 0(0%)    | 0(0%) | 7(7.1%)   | 0(0%) | 0(0%)    |
| Q32P51 | HNRNPA1L2 | 0(0%) | 0(0%)    | 0(0%) | 7(10.3%)  | 0(0%) | 0(0%)    |
| P06702 | S100A9    | 0(0%) | 0(0%)    | 0(0%) | 7(34.2%)  | 0(0%) | 0(0%)    |
| P18124 | RPL7      | 0(0%) | 7(19.4%) | 0(0%) | 0(0%)     | 0(0%) | 0(0%)    |
| P24534 | EEF1B2    | 0(0%) | 0(0%)    | 0(0%) | 7(34.2%)  | 0(0%) | 0(0%)    |
| Q08211 | DHX9      | 0(0%) | 0(0%)    | 0(0%) | 7(4.2%)   | 0(0%) | 0(0%)    |
| O94776 | MTA2      | 0(0%) | 0(0%)    | 0(0%) | 6(9.7%)   | 0(0%) | 0(0%)    |
| Q6P2Q9 | PRPF8     | 0(0%) | 0(0%)    | 0(0%) | 6(3.9%)   | 0(0%) | 0(0%)    |
| P43686 | PSMC4     | 0(0%) | 0(0%)    | 0(0%) | 6(22.7%)  | 0(0%) | 0(0%)    |
| P55795 | HNRNPH2   | 0(0%) | 4(6%)    | 0(0%) | 2(5.1%)   | 0(0%) | 0(0%)    |

|        |          |       |          |       |          |       |         |
|--------|----------|-------|----------|-------|----------|-------|---------|
| P05141 | SLC25A5  | 0(0%) | 0(0%)    | 0(0%) | 6(11.7%) | 0(0%) | 0(0%)   |
| P49327 | FASN     | 0(0%) | 0(0%)    | 0(0%) | 6(4.1%)  | 0(0%) | 0(0%)   |
| P07437 | TUBB     | 0(0%) | 0(0%)    | 0(0%) | 6(28.2%) | 0(0%) | 0(0%)   |
| Q09028 | RBBP4    | 0(0%) | 0(0%)    | 0(0%) | 6(12.2%) | 0(0%) | 0(0%)   |
| O00303 | EIF3F    | 0(0%) | 0(0%)    | 0(0%) | 6(9.2%)  | 0(0%) | 0(0%)   |
| P27635 | RPL10    | 0(0%) | 2(11.7%) | 0(0%) | 4(28%)   | 0(0%) | 0(0%)   |
| P62191 | PSMC1    | 0(0%) | 0(0%)    | 0(0%) | 6(11.6%) | 0(0%) | 0(0%)   |
| P62333 | PSMC6    | 0(0%) | 0(0%)    | 0(0%) | 6(20.8%) | 0(0%) | 0(0%)   |
| P27708 | CAD      | 0(0%) | 0(0%)    | 0(0%) | 6(3.9%)  | 0(0%) | 0(0%)   |
| P46777 | RPL5     | 0(0%) | 6(16.8%) | 0(0%) | 0(0%)    | 0(0%) | 0(0%)   |
| Q15008 | PSMD6    | 0(0%) | 0(0%)    | 0(0%) | 6(12.9%) | 0(0%) | 0(0%)   |
| P54105 | CLNS1A   | 0(0%) | 0(0%)    | 0(0%) | 6(24.1%) | 0(0%) | 0(0%)   |
| P53621 | COPA     | 0(0%) | 0(0%)    | 0(0%) | 6(5.4%)  | 0(0%) | 0(0%)   |
| P08238 | HSP90AB1 | 0(0%) | 0(0%)    | 0(0%) | 4(7.9%)  | 0(0%) | 2(2.9%) |
| P08670 | VIM      | 0(0%) | 0(0%)    | 0(0%) | 6(16.5%) | 0(0%) | 0(0%)   |
| P35580 | MYH10    | 0(0%) | 0(0%)    | 0(0%) | 5(3.4%)  | 0(0%) | 0(0%)   |
| Q9BYE4 | SPRR2G   | 0(0%) | 0(0%)    | 0(0%) | 5(30.1%) | 0(0%) | 0(0%)   |
| P47914 | RPL29    | 0(0%) | 5(14.5%) | 0(0%) | 0(0%)    | 0(0%) | 0(0%)   |
| O60812 | HNRNPCL1 | 0(0%) | 5(17.1%) | 0(0%) | 0(0%)    | 0(0%) | 0(0%)   |
| P43243 | MATR3    | 0(0%) | 0(0%)    | 0(0%) | 5(5%)    | 0(0%) | 0(0%)   |
| P62263 | RPS14    | 0(0%) | 0(0%)    | 0(0%) | 5(29.1%) | 0(0%) | 0(0%)   |
| P25398 | RPS12    | 0(0%) | 0(0%)    | 0(0%) | 5(40.9%) | 0(0%) | 0(0%)   |
| Q13547 | HDAC1    | 0(0%) | 0(0%)    | 0(0%) | 5(8.3%)  | 0(0%) | 0(0%)   |
| P62701 | RPS4X    | 0(0%) | 5(14.8%) | 0(0%) | 0(0%)    | 0(0%) | 0(0%)   |
| P35325 | SPRR2B   | 0(0%) | 0(0%)    | 0(0%) | 5(30.6%) | 0(0%) | 0(0%)   |
| P35326 | SPRR2A   | 0(0%) | 0(0%)    | 0(0%) | 5(30.6%) | 0(0%) | 0(0%)   |
| P17980 | PSMC3    | 0(0%) | 0(0%)    | 0(0%) | 5(15.9%) | 0(0%) | 0(0%)   |
| P68371 | TUBB4B   | 0(0%) | 0(0%)    | 0(0%) | 5(24%)   | 0(0%) | 0(0%)   |
| P46779 | RPL28    | 0(0%) | 5(17.5%) | 0(0%) | 0(0%)    | 0(0%) | 0(0%)   |
| P40429 | RPL13A   | 0(0%) | 5(9.9%)  | 0(0%) | 0(0%)    | 0(0%) | 0(0%)   |
| P12236 | SLC25A6  | 0(0%) | 0(0%)    | 0(0%) | 5(8.4%)  | 0(0%) | 0(0%)   |
| P12235 | SLC25A4  | 0(0%) | 0(0%)    | 0(0%) | 5(8.4%)  | 0(0%) | 0(0%)   |
| P20930 | FLG      | 0(0%) | 0(0%)    | 0(0%) | 5(1%)    | 0(0%) | 0(0%)   |
| P22532 | SPRR2D   | 0(0%) | 0(0%)    | 0(0%) | 5(30.6%) | 0(0%) | 0(0%)   |



|        |           |       |         |       |          |       |          |
|--------|-----------|-------|---------|-------|----------|-------|----------|
| P22531 | SPRR2E    | 0(0%) | 0(0%)   | 0(0%) | 5(30.6%) | 0(0%) | 0(0%)    |
| Q9BRS2 | RIOK1     | 0(0%) | 0(0%)   | 0(0%) | 4(12.3%) | 0(0%) | 0(0%)    |
| P31151 | S100A7    | 0(0%) | 0(0%)   | 0(0%) | 4(35.6%) | 0(0%) | 0(0%)    |
| Q14683 | SMC1A     | 0(0%) | 0(0%)   | 0(0%) | 4(2.4%)  | 0(0%) | 0(0%)    |
| Q58FF7 | HSP90AB3P | 0(0%) | 0(0%)   | 0(0%) | 2(4.2%)  | 0(0%) | 2(3.5%)  |
| Q07866 | KLC1      | 0(0%) | 0(0%)   | 0(0%) | 4(2.4%)  | 0(0%) | 0(0%)    |
| Q00610 | CLTC      | 0(0%) | 0(0%)   | 0(0%) | 4(3.8%)  | 0(0%) | 0(0%)    |
| P35998 | PSMC2     | 0(0%) | 0(0%)   | 0(0%) | 4(12.2%) | 0(0%) | 0(0%)    |
| Q9BVA1 | TUBB2B    | 0(0%) | 0(0%)   | 0(0%) | 4(18%)   | 0(0%) | 0(0%)    |
| O43852 | CALU      | 0(0%) | 0(0%)   | 0(0%) | 0(0%)    | 0(0%) | 4(14.3%) |
| P23458 | JAK1      | 0(0%) | 0(0%)   | 0(0%) | 0(0%)    | 0(0%) | 4(2.9%)  |
| P04350 | TUBB4A    | 0(0%) | 0(0%)   | 0(0%) | 4(20%)   | 0(0%) | 0(0%)    |
| O43143 | DHX15     | 0(0%) | 2(3.3%) | 0(0%) | 2(3%)    | 0(0%) | 0(0%)    |
| A6NHT5 | HMX3      | 0(0%) | 4(4.5%) | 0(0%) | 0(0%)    | 0(0%) | 0(0%)    |
| P05109 | S100A8    | 0(0%) | 0(0%)   | 0(0%) | 4(20.4%) | 0(0%) | 0(0%)    |
| Q8WXI9 | GATAD2B   | 0(0%) | 0(0%)   | 0(0%) | 4(6.7%)  | 0(0%) | 0(0%)    |
| Q7L2H7 | EIF3M     | 0(0%) | 0(0%)   | 0(0%) | 4(15.5%) | 0(0%) | 0(0%)    |
| Q9H0B6 | KLC2      | 0(0%) | 0(0%)   | 0(0%) | 4(2.3%)  | 0(0%) | 0(0%)    |
| O00487 | PSMD14    | 0(0%) | 0(0%)   | 0(0%) | 4(10%)   | 0(0%) | 0(0%)    |
| P62081 | RPS7      | 0(0%) | 0(0%)   | 0(0%) | 4(13.4%) | 0(0%) | 0(0%)    |
| Q13885 | TUBB2A    | 0(0%) | 0(0%)   | 0(0%) | 4(18%)   | 0(0%) | 0(0%)    |
| P25787 | PSMA2     | 0(0%) | 0(0%)   | 0(0%) | 4(23.5%) | 0(0%) | 0(0%)    |
| Q6PKG0 | LARP1     | 0(0%) | 0(0%)   | 0(0%) | 4(2.8%)  | 0(0%) | 0(0%)    |
| Q15750 | TAB1      | 0(0%) | 0(0%)   | 0(0%) | 4(9.3%)  | 0(0%) | 0(0%)    |
| Q06265 | EXOSC9    | 0(0%) | 4(5.5%) | 0(0%) | 0(0%)    | 0(0%) | 0(0%)    |
| Q8NC51 | SERBP1    | 0(0%) | 0(0%)   | 0(0%) | 0(0%)    | 0(0%) | 4(7.1%)  |
| Q15029 | EFTUD2    | 0(0%) | 0(0%)   | 0(0%) | 4(3.2%)  | 0(0%) | 0(0%)    |
| P26640 | VARS      | 0(0%) | 0(0%)   | 0(0%) | 4(3%)    | 0(0%) | 0(0%)    |
| P14625 | HSP90B1   | 0(0%) | 0(0%)   | 0(0%) | 2(3.5%)  | 0(0%) | 2(5.1%)  |
| Q14315 | FLNC      | 0(0%) | 0(0%)   | 0(0%) | 3(1.2%)  | 0(0%) | 0(0%)    |
| Q14697 | GANAB     | 0(0%) | 0(0%)   | 0(0%) | 3(1.8%)  | 0(0%) | 0(0%)    |
| Q5T750 | XP32      | 0(0%) | 0(0%)   | 0(0%) | 3(6.4%)  | 0(0%) | 0(0%)    |
| P05023 | ATP1A1    | 0(0%) | 0(0%)   | 0(0%) | 3(3%)    | 0(0%) | 0(0%)    |
| Q99623 | PHB2      | 0(0%) | 0(0%)   | 0(0%) | 3(11%)   | 0(0%) | 0(0%)    |

|        |          |       |          |       |          |       |         |
|--------|----------|-------|----------|-------|----------|-------|---------|
| P07814 | EPRS     | 0(0%) | 0(0%)    | 0(0%) | 3(3.2%)  | 0(0%) | 0(0%)   |
| Q99873 | PRMT1    | 0(0%) | 0(0%)    | 0(0%) | 3(7.5%)  | 0(0%) | 0(0%)   |
| Q16531 | DDB1     | 0(0%) | 0(0%)    | 0(0%) | 3(2.8%)  | 0(0%) | 0(0%)   |
| P60900 | PSMA6    | 0(0%) | 0(0%)    | 0(0%) | 3(8.9%)  | 0(0%) | 0(0%)   |
| Q13435 | SF3B2    | 0(0%) | 0(0%)    | 0(0%) | 3(4.9%)  | 0(0%) | 0(0%)   |
| P25705 | ATP5A1   | 0(0%) | 0(0%)    | 0(0%) | 3(4.3%)  | 0(0%) | 0(0%)   |
| Q04637 | EIF4G1   | 0(0%) | 0(0%)    | 0(0%) | 3(1.8%)  | 0(0%) | 0(0%)   |
| P61626 | LYZ      | 0(0%) | 0(0%)    | 0(0%) | 3(30.4%) | 0(0%) | 0(0%)   |
| Q13330 | MTA1     | 0(0%) | 0(0%)    | 0(0%) | 3(4.5%)  | 0(0%) | 0(0%)   |
| P46778 | RPL21    | 0(0%) | 0(0%)    | 0(0%) | 3(16.2%) | 0(0%) | 0(0%)   |
| P61247 | RPS3A    | 0(0%) | 0(0%)    | 0(0%) | 3(10.2%) | 0(0%) | 0(0%)   |
| P61163 | ACTR1A   | 0(0%) | 0(0%)    | 0(0%) | 3(8.8%)  | 0(0%) | 0(0%)   |
| Q15233 | NONO     | 0(0%) | 0(0%)    | 0(0%) | 3(11.9%) | 0(0%) | 0(0%)   |
| P51991 | HNRNPA3  | 0(0%) | 0(0%)    | 0(0%) | 3(9.5%)  | 0(0%) | 0(0%)   |
| Q9NY65 | TUBA8    | 0(0%) | 0(0%)    | 0(0%) | 3(10.5%) | 0(0%) | 0(0%)   |
| P20700 | LMNB1    | 0(0%) | 0(0%)    | 0(0%) | 3(10.1%) | 0(0%) | 0(0%)   |
| Q92526 | CCT6B    | 0(0%) | 0(0%)    | 0(0%) | 3(2.5%)  | 0(0%) | 0(0%)   |
| P63151 | PPP2R2A  | 0(0%) | 0(0%)    | 0(0%) | 0(0%)    | 0(0%) | 3(3.4%) |
| Q9UNM6 | PSMD13   | 0(0%) | 0(0%)    | 0(0%) | 3(8.2%)  | 0(0%) | 0(0%)   |
| Q9Y265 | RUVBL1   | 0(0%) | 0(0%)    | 0(0%) | 3(4.8%)  | 0(0%) | 0(0%)   |
| P35579 | MYH9     | 0(0%) | 0(0%)    | 0(0%) | 2(1.3%)  | 0(0%) | 0(0%)   |
| Q14406 | CSHL1    | 0(0%) | 2(3.6%)  | 0(0%) | 0(0%)    | 0(0%) | 0(0%)   |
| P28074 | PSMB5    | 0(0%) | 0(0%)    | 0(0%) | 2(10.6%) | 0(0%) | 0(0%)   |
| P28070 | PSMB4    | 0(0%) | 0(0%)    | 0(0%) | 2(11.4%) | 0(0%) | 0(0%)   |
| Q9BUA3 | C11orf84 | 0(0%) | 0(0%)    | 0(0%) | 0(0%)    | 0(0%) | 2(3.1%) |
| Q14008 | CKAP5    | 0(0%) | 0(0%)    | 0(0%) | 2(1.8%)  | 0(0%) | 0(0%)   |
| Q9UBQ5 | EIF3K    | 0(0%) | 0(0%)    | 0(0%) | 2(13.3%) | 0(0%) | 0(0%)   |
| O43809 | NUDT21   | 0(0%) | 0(0%)    | 0(0%) | 2(10.6%) | 0(0%) | 0(0%)   |
| P69849 | NOMO3    | 0(0%) | 0(0%)    | 0(0%) | 2(1.9%)  | 0(0%) | 0(0%)   |
| P55036 | PSMD4    | 0(0%) | 0(0%)    | 0(0%) | 2(4.8%)  | 0(0%) | 0(0%)   |
| Q9H853 | TUBA4B   | 0(0%) | 0(0%)    | 0(0%) | 2(11.6%) | 0(0%) | 0(0%)   |
| P13010 | XRCC5    | 0(0%) | 0(0%)    | 0(0%) | 2(2.9%)  | 0(0%) | 0(0%)   |
| P49207 | RPL34    | 0(0%) | 2(15.4%) | 0(0%) | 0(0%)    | 0(0%) | 0(0%)   |
| P07900 | HSP90AA1 | 0(0%) | 0(0%)    | 0(0%) | 2(3.3%)  | 0(0%) | 0(0%)   |

|        |         |       |          |       |          |       |       |
|--------|---------|-------|----------|-------|----------|-------|-------|
| Q7Z406 | MYH14   | 0(0%) | 0(0%)    | 0(0%) | 2(1.1%)  | 0(0%) | 0(0%) |
| Q7Z6Z7 | HUWE1   | 0(0%) | 0(0%)    | 0(0%) | 2(0.6%)  | 0(0%) | 0(0%) |
| P49792 | RANBP2  | 0(0%) | 0(0%)    | 0(0%) | 2(0.6%)  | 0(0%) | 0(0%) |
| P62140 | PPP1CB  | 0(0%) | 0(0%)    | 0(0%) | 2(9.2%)  | 0(0%) | 0(0%) |
| P62244 | RPS15A  | 0(0%) | 0(0%)    | 0(0%) | 2(12.3%) | 0(0%) | 0(0%) |
| O00571 | DDX3X   | 0(0%) | 0(0%)    | 0(0%) | 2(4.2%)  | 0(0%) | 0(0%) |
| P62314 | SNRPD1  | 0(0%) | 0(0%)    | 0(0%) | 2(10.9%) | 0(0%) | 0(0%) |
| P60842 | EIF4A1  | 0(0%) | 0(0%)    | 0(0%) | 2(7.6%)  | 0(0%) | 0(0%) |
| P60660 | MYL6    | 0(0%) | 0(0%)    | 0(0%) | 2(15.9%) | 0(0%) | 0(0%) |
| Q13509 | TUBB3   | 0(0%) | 0(0%)    | 0(0%) | 2(6.4%)  | 0(0%) | 0(0%) |
| P62851 | RPS25   | 0(0%) | 2(15.2%) | 0(0%) | 0(0%)    | 0(0%) | 0(0%) |
| Q86SG5 | S100A7A | 0(0%) | 0(0%)    | 0(0%) | 2(23.8%) | 0(0%) | 0(0%) |
| P61313 | RPL15   | 0(0%) | 2(10.3%) | 0(0%) | 0(0%)    | 0(0%) | 0(0%) |
| Q96L21 | RPL10L  | 0(0%) | 0(0%)    | 0(0%) | 2(8.9%)  | 0(0%) | 0(0%) |
| P01243 | CSH1    | 0(0%) | 2(3.7%)  | 0(0%) | 0(0%)    | 0(0%) | 0(0%) |
| P01241 | GH1     | 0(0%) | 2(3.7%)  | 0(0%) | 0(0%)    | 0(0%) | 0(0%) |
| P01242 | GH2     | 0(0%) | 2(3.7%)  | 0(0%) | 0(0%)    | 0(0%) | 0(0%) |
| Q13283 | G3BP1   | 0(0%) | 0(0%)    | 0(0%) | 2(4.1%)  | 0(0%) | 0(0%) |
| Q15393 | SF3B3   | 0(0%) | 2(2.2%)  | 0(0%) | 0(0%)    | 0(0%) | 0(0%) |
| Q15459 | SF3A1   | 0(0%) | 0(0%)    | 0(0%) | 2(4.8%)  | 0(0%) | 0(0%) |
| P46821 | MAP1B   | 0(0%) | 0(0%)    | 0(0%) | 2(1%)    | 0(0%) | 0(0%) |
| P61254 | RPL26   | 0(0%) | 2(11%)   | 0(0%) | 0(0%)    | 0(0%) | 0(0%) |
| P83731 | RPL24   | 0(0%) | 2(13.4%) | 0(0%) | 0(0%)    | 0(0%) | 0(0%) |
| Q15155 | NOMO1   | 0(0%) | 0(0%)    | 0(0%) | 2(1.9%)  | 0(0%) | 0(0%) |
| O15523 | DDX3Y   | 0(0%) | 0(0%)    | 0(0%) | 2(4.2%)  | 0(0%) | 0(0%) |
| Q96DI7 | SNRNP40 | 0(0%) | 0(0%)    | 0(0%) | 2(5.9%)  | 0(0%) | 0(0%) |
| Q99417 | MYCBP   | 0(0%) | 0(0%)    | 0(0%) | 2(19.4%) | 0(0%) | 0(0%) |
| P53618 | COPB1   | 0(0%) | 0(0%)    | 0(0%) | 2(3.6%)  | 0(0%) | 0(0%) |
| Q92616 | GCN1L1  | 0(0%) | 0(0%)    | 0(0%) | 2(1%)    | 0(0%) | 0(0%) |
| Q9UQE7 | SMC3    | 0(0%) | 0(0%)    | 0(0%) | 2(1.6%)  | 0(0%) | 0(0%) |
| Q9NYJ8 | TAB2    | 0(0%) | 0(0%)    | 0(0%) | 2(3.5%)  | 0(0%) | 0(0%) |
| P26373 | RPL13   | 0(0%) | 2(8.5%)  | 0(0%) | 0(0%)    | 0(0%) | 0(0%) |
| P18077 | RPL35A  | 0(0%) | 2(16.4%) | 0(0%) | 0(0%)    | 0(0%) | 0(0%) |
| Q5JPE7 | NOMO2   | 0(0%) | 0(0%)    | 0(0%) | 2(1.8%)  | 0(0%) | 0(0%) |

|        |         |          |          |         |            |          |          |
|--------|---------|----------|----------|---------|------------|----------|----------|
| Q9UNX3 | RPL26L1 | 0(0%)    | 2(11%)   | 0(0%)   | 0(0%)      | 0(0%)    | 0(0%)    |
| P36542 | ATP5C1  | 0(0%)    | 0(0%)    | 0(0%)   | 2(7%)      | 0(0%)    | 0(0%)    |
| P57052 | RBM11   | 0(0%)    | 0(0%)    | 0(0%)   | 2(3.9%)    | 0(0%)    | 0(0%)    |
| Q9Y295 | DRG1    | 0(0%)    | 0(0%)    | 0(0%)   | 0(0%)      | 0(0%)    | 2(4.6%)  |
| P61978 | HNRNPK  | 0(0%)    | 0(0%)    | 0(0%)   | 2(3.2%)    | 0(0%)    | 0(0%)    |
| O75369 | FLNB    | 0(0%)    | 0(0%)    | 0(0%)   | 2(0.9%)    | 0(0%)    | 0(0%)    |
| P50990 | CCT8    | 0(0%)    | 0(0%)    | 0(0%)   | 39(38%)    | 2(4.7%)  | 5(2.6%)  |
| P39019 | RPS19   | 2(11%)   | 0(0%)    | 0(0%)   | 22(34.5%)  | 0(0%)    | 0(0%)    |
| P0CG48 | UBC     | 2(3.6%)  | 4(3.6%)  | 0(0%)   | 6(3.2%)    | 0(0%)    | 0(0%)    |
| P0CG47 | UBB     | 2(10.9%) | 4(10.9%) | 0(0%)   | 6(9.6%)    | 0(0%)    | 0(0%)    |
| P62979 | RPS27A  | 2(16%)   | 4(16%)   | 0(0%)   | 6(14.1%)   | 0(0%)    | 0(0%)    |
| P62987 | UBA52   | 2(19.5%) | 4(19.5%) | 0(0%)   | 6(17.2%)   | 0(0%)    | 0(0%)    |
| P09651 | HNRNPA1 | 2(7.5%)  | 0(0%)    | 0(0%)   | 9(13.2%)   | 0(0%)    | 0(0%)    |
| P62888 | RPL30   | 2(14.8%) | 7(32.2%) | 0(0%)   | 2(20.9%)   | 0(0%)    | 0(0%)    |
| Q8NHM4 | PRSS3P2 | 2(14.6%) | 2(12.1%) | 0(0%)   | 0(0%)      | 0(0%)    | 0(0%)    |
| P47929 | LGALS7  | 2(18.4%) | 0(0%)    | 0(0%)   | 0(0%)      | 0(0%)    | 0(0%)    |
| Q53GS9 | USP39   | 2(3.7%)  | 0(0%)    | 0(0%)   | 0(0%)      | 0(0%)    | 0(0%)    |
| Q7Z7F7 | MRPL55  | 0(0%)    | 0(0%)    | 0(0%)   | 0(0%)      | 2(11.7%) | 0(0%)    |
| Q86YZ3 | HRNR    | 2(1.7%)  | 0(0%)    | 0(0%)   | 0(0%)      | 0(0%)    | 0(0%)    |
| Q92620 | DHX38   | 2(2.1%)  | 0(0%)    | 0(0%)   | 0(0%)      | 0(0%)    | 0(0%)    |
| P23396 | RPS3    | 3(14.4%) | 4(17.7%) | 0(0%)   | 15(35.8%)  | 0(0%)    | 0(0%)    |
| P32969 | RPL9    | 3(12%)   | 4(5.7%)  | 0(0%)   | 12(37.5%)  | 0(0%)    | 0(0%)    |
| P54652 | HSPA2   | 0(0%)    | 0(0%)    | 0(0%)   | 7(4.5%)    | 3(3.9%)  | 0(0%)    |
| P35268 | RPL22   | 3(18.8%) | 4(19.5%) | 0(0%)   | 0(0%)      | 0(0%)    | 0(0%)    |
| P01040 | CSTA    | 3(30.6%) | 2(30.6%) | 0(0%)   | 0(0%)      | 0(0%)    | 0(0%)    |
| Q15208 | STK38   | 0(0%)    | 0(0%)    | 0(0%)   | 0(0%)      | 3(11.6%) | 0(0%)    |
| P81605 | DCD     | 4(37.3%) | 2(12.7%) | 0(0%)   | 19(531.6%) | 0(0%)    | 2(23.6%) |
| P11142 | HSPA8   | 0(0%)    | 4(4.2%)  | 0(0%)   | 16(13.3%)  | 4(5.4%)  | 0(0%)    |
| P48643 | CCT5    | 0(0%)    | 0(0%)    | 3(2.2%) | 53(51.8%)  | 2(5.2%)  | 6(2.2%)  |
| P34931 | HSPA1L  | 2(3.9%)  | 7(6.1%)  | 0(0%)   | 3(5.5%)    | 3(4.2%)  | 0(0%)    |
| P30050 | RPL12   | 2(18.8%) | 0(0%)    | 0(0%)   | 9(14.5%)   | 3(18.2%) | 0(0%)    |
| P02768 | ALB     | 5(5.1%)  | 2(2.8%)  | 0(0%)   | 5(3.9%)    | 0(0%)    | 0(0%)    |
| P62857 | RPS28   | 5(33.3%) | 0(0%)    | 0(0%)   | 2(23.2%)   | 0(0%)    | 0(0%)    |
| Q16875 | PFKFB3  | 0(0%)    | 0(0%)    | 0(0%)   | 0(0%)      | 7(7.1%)  | 0(0%)    |

|        |           |            |           |          |            |           |           |
|--------|-----------|------------|-----------|----------|------------|-----------|-----------|
| P22626 | HNRNPA2B1 | 8(16.4%)   | 9(25.8%)  | 0(0%)    | 31(30.9%)  | 0(0%)     | 8(9.1%)   |
| P48741 | HSPA7     | 0(0%)      | 0(0%)     | 0(0%)    | 10(3.3%)   | 8(6.8%)   | 0(0%)     |
| Q9BYX7 | POTEKP    | 9(6.7%)    | 8(6.7%)   | 0(0%)    | 0(0%)      | 0(0%)     | 0(0%)     |
| Q6S8J3 | POTEE     | 9(2.3%)    | 8(2.3%)   | 0(0%)    | 0(0%)      | 0(0%)     | 0(0%)     |
| A5A3E0 | POTEF     | 9(2.3%)    | 8(2.3%)   | 0(0%)    | 0(0%)      | 0(0%)     | 0(0%)     |
| Q9Y657 | SPIN1     | 0(0%)      | 0(0%)     | 0(0%)    | 0(0%)      | 9(6.5%)   | 4(6.5%)   |
| P17066 | HSPA6     | 2(4.5%)    | 7(4.5%)   | 0(0%)    | 10(1.9%)   | 9(6.4%)   | 0(0%)     |
| P62736 | ACTA2     | 11(9.5%)   | 8(6.6%)   | 0(0%)    | 0(0%)      | 0(0%)     | 0(0%)     |
| P68133 | ACTA1     | 11(9.5%)   | 8(6.6%)   | 0(0%)    | 0(0%)      | 0(0%)     | 0(0%)     |
| P68032 | ACTC1     | 11(9.5%)   | 8(6.6%)   | 0(0%)    | 0(0%)      | 0(0%)     | 0(0%)     |
| P63267 | ACTG2     | 11(9.6%)   | 8(6.6%)   | 0(0%)    | 0(0%)      | 0(0%)     | 0(0%)     |
| P08107 | HSPA1A    | 4(8.7%)    | 22(15.6%) | 0(0%)    | 58(31.8%)  | 11(10.9%) | 0(0%)     |
| P60709 | ACTB      | 15(17.1%)  | 9(12.3%)  | 0(0%)    | 4(12.8%)   | 0(0%)     | 0(0%)     |
| P63261 | ACTG1     | 15(17.1%)  | 9(12.3%)  | 0(0%)    | 4(12.8%)   | 0(0%)     | 0(0%)     |
| O75688 | PPM1B     | 0(0%)      | 0(0%)     | 0(0%)    | 0(0%)      | 17(26.7%) | 0(0%)     |
| Q9BQA1 | WDR77     | 0(0%)      | 0(0%)     | 10(9.4%) | 103(81.7%) | 9(17.3%)  | 0(0%)     |
| Q8WWY3 | PRPF31    | 0(0%)      | 0(0%)     | 0(0%)    | 17(26.9%)  | 19(19.6%) | 3(9.6%)   |
| P69905 | HBA1      | 21(23.9%)  | 17(28.2%) | 0(0%)    | 0(0%)      | 0(0%)     | 0(0%)     |
| P02042 | HBD       | 25(25.2%)  | 0(0%)     | 0(0%)    | 0(0%)      | 0(0%)     | 0(0%)     |
| P68871 | HBB       | 40(591.2%) | 19(10.9%) | 0(0%)    | 0(0%)      | 0(0%)     | 0(0%)     |
| P98175 | RBM10     | 40(19.9%)  | 2(3.2%)   | 0(0%)    | 51(21.3%)  | 21(10.8%) | 47(11.6%) |
| O14744 | PRMT5     | 7(7.2%)    | 5(3%)     | 41(11%)  | 246(64.1%) | 37(28.9%) | 13(6.3%)  |
| P23588 | EIF4B     | 0(0%)      | 0(0%)     | 0(0%)    | 0(0%)      | 90(40.8%) | 51(25.4%) |

**Table S2. Primers and siRNAs used in this study**

## 1) Primers for RT-PCR

| Sense (5'-3')          |                           | antisense(5'-3')        |                          |
|------------------------|---------------------------|-------------------------|--------------------------|
| KO-009 RBM7 S          | CAGGTACGAAAGGACTATGG      | KO-010 RBM7 AS          | GTCTCAAAGCACTGTTTCATCAC  |
| KO-060 GAPDH S         | ACGACCACTTTGTCAAGCTC      | KO-061 GAPDH AS         | TTCTCTTGTGCTCTTGCTG      |
| KO-064 CSTF3 int pA S  | CTGGAAACTGTACATTGAAGCAGAG | KO-065 CSTF3 int pA AS  | TCCTCCTTGCCTAATTGGCTAT   |
| KO-066 CSTF3 last pA S | GCCTCTGCAGAAAACCTCTG      | KO-067 CSTF3 last pA AS | CCATGTGATAGAGGCACCAA     |
| KO-068 DIDO1 int pA S  | CCAAACTCTTGCCCTTTGAG      | KO-069 DIDO1 int pA AS  | TCCTAACTCCTGCTCCCAGA     |
| KO-070 DIDO1 last pA S | TTGGTGTGAAAGCCAAGTG       | KO-071 DIDO1 last pA AS | CCTTCTCATCGTACTAGATGTTGG |
| KO-072 DAP int pA S    | CGGCCCACTACACTAAAGGA      | KO-073 DAP int pA AS    | TGAGCATTGAGGCACAAGTC     |
| KO-074 DAP last pA S   | GCCTTCTGGTGCTGTTCTC       | KO-075 DAP last pA AS   | TTTCAAGTGTGAGGCTGTGC     |
| KO-091 TMED4 int pA S  | CAGTTGCTTGATCAGGTGGA      | KO-092 TMED4 int pA AS  | AGCTGATCTCCAAGCAGAA      |
| KO-093 TMED4 last pA S | CACTTGCTGACCCTGGTTCT      | KO-094 TMED4 last pA AS | GGAAAATCACTCGAGGCAAA     |
| KO-095 CD55 int pA S   | TTGCCAGAGTGCAGAGGTAA      | KO-096 CD55 int pA AS   | TGAAAGGTGGGTTTGCTACA     |
| KO-097 CD55 last pA S  | GGCAGTCTGGAATCACATT       | KO-098 CD55 last pA AS  | TTTTCTCGTGATCCCATTTC     |
| KO-116 ZNF207 UA S     | TGGGCGCTGTCTCTATCTTT      | KO-126 ZNF207 UA AS     | GCATGCGAATGGAAAACAG      |
| KO-118 IGF2BP1 UA S    | ACGTGGCTGGGTAGAACAAA      | KO-119 IGF2BP1 UA AS    | AGAAATGGGGCTGGGACTTA     |
| KO-120 AIFM1 UA S      | CCATGCTTAAGTCCAGATGCT     | KO-121 AIFM1 UA AS      | CCCTCACAATGGTTTCGACTT    |
| KO-189 proRBM39 S      | CATTTTTGAAGGAACGGTAG      | KO-188 proRBM39 AS      | GGAAATAGTGGAGAAAAGCA     |
| KO-190 proBIRC4 S      | ATCCATCATCTCACCACATT      | KO-191 proBIRC4 AS      | CTGGTCATACCCTGGATTTA     |
| KO-217 proFBXO7 S      | TTGGGGTGATTGTTATGCAG      | KO-218 proFBXO7 AS      | AGGCCTCAATGAGCTGTGAT     |
| KO-256 CSTF3 exon2 S   | GGTGAAGAAAGCGGAAAAGA      | KO-065 CSTF3 int pA AS  | TCCTCCTTGCCTAATTGGCTAT   |
| KO-257 TMED4 exon3 S   | TACCAGGATGGCTCTCTTCG      | KO-092 TMED4 int pA AS  | AGCTGATCTCCAAGCAGAA      |
| KO-261 NEAT1 S         | TTGGTTCTGAGCTGCGTCTA      | KO-262 NEAT1 AS         | GTGCTGTAAAGGGGAAGAAA     |
| KO-265 RPPH1 S         | TGCTACTCCACTCCCATGTC      | KO-266 RPPH1 AS         | CAGCCATTGAACTCACTTCG     |

## 2) Primers for RL-PAT assay

| primary PCR              |                           | secondary PCR             |                          |
|--------------------------|---------------------------|---------------------------|--------------------------|
| KO-064 CSTF3 int pA S    | CTGGAAACTGTACATTGAAGCAGAG | KO-106 CSTF3 int PAT 2nd  | GCCAATTAGGACAAGGAGGATT   |
| KO-419 DIDO1 int PAT 1st | GCTCTTCTGGGAAGAATGTTTG    | KO-420 DIDO1 int PAT 2nd  | TGTCAGGTAAGCATTCTTCAGT   |
| KO-418 TMED4 int PAT 1st | GTTCTCACAGTTCATCCATGTT    | KO-107 TMED4 int PAT 2nd  | GCATGTGTCAGAATTTCTTAAGGC |
| KO-132 DAP int S PAT 1st | CAGGAAGCTCTGGTGTCTTGT     | KO-072 DAP int pA S       | CGGCCACTACACTAAAGGA      |
| KO-126 ZNF207 UA AS      | GCATGCGAATGGAAAACAG       | KO-129 ZNF207 UA PAT 2nd  | AAAGATAGAGACAGCGCCCA     |
| KO-119 IGF2BP1 UA AS     | AGAAATGGGGCTGGGACTTA      | KO-130 IGF2BP1 UA PAT 2nd | TTTGTTCTACCCAGCCACGT     |
| KO-154 MAN1A2 UA AS      | TCACCGGAGTTAATGGCTTC      | KO-155 MAN1A2 UA PAT 2nd  | GAGGATTCAGCAACAGGGTC     |

## 3) Primers for plasmid construction

| Sense (5'-3')                     |                                       | antisense(5'-3')              |                                      |
|-----------------------------------|---------------------------------------|-------------------------------|--------------------------------------|
| KO-052 Mtr4 Sall S                | TTTGTCGACATGGCGGACGCATTCGGAG<br>AT    | KO-053 Mtr4 Xbal<br>AS        | ATATCTAGACTACAAGTAGAGGCTGGCAGCA<br>A |
| KO-295 NRDE2<br>3Flag Sall KpnI S | AAAAGTCGACGGTACCATGGCGCTGTTC<br>CCAGC | KO-296 NRDE2<br>3Flag Xbal AS | AATTTCTAGACTAATCCTCCAGCAGCA          |
| KO-380 hnRNPU<br>PstI S           | TTCCCTGCAGATGAGTTCCTCGCCTGTT          | KO-381 hnRNPU<br>Sall AS      | TTTTGTCGACTCAATAATATCCTTGGTGATAA     |
| KO-382 hnRNPM<br>PstI S           | TTTCCTGCAGATGGCGGCAGGGGTCGA           | KO-383 hnRNPM<br>Sall AS      | TTTTGTCGACTTAAGCGTTTCTATCAATTC       |
| KO-400 Prp31<br>Sall S            | TTTTGTCGACATGTCTCTGGCAGATGAG<br>C     | KO-401 Prp31<br>Xbal AS       | TTTTTCTAGATCAGGTGGACATAAGGCC         |
| KO-402 SNRNP40<br>Sall S          | TTTTGTCGACATGATAGAACAGCAGAAG<br>CGT   | KO-403 SNRNP40<br>Xbal AS     | TTTTCTAGATCTTCACTGAATCTCTCCCA        |

## 4) siRNAs

| Name     | Sense (5'-3')          | antisense(5'-3')      |
|----------|------------------------|-----------------------|
| siMtr4   | CAAUUAAAGGCUCUGAGUAATT | UUACUCAGAGCCUAAUUGTT  |
| siRBM7   | GUCAUAUGGUGGAAAUUUTT   | AAAUUUUCCACCAUAUGACTT |
| siZCCHC8 | GAAAUACAACAGAAUAAAATT  | UUUUUUUCUGUUGUAUUUCTT |
| siZCCHC7 | CUAUUGAGCUGGUUGUAUAATT | UUAUCAACCAGCUCAUUAGTT |
| siZFC3H1 | GAAACAAGCUGAAGAAGAATT  | UUCUUCUUCAGCUUGUUUCTT |
